# Supplementary material for: Inhibitory Effect of Isoliquiritigenin in Niemann-Pick C1-Like 1-Mediated Cholesterol Uptake
Source: MDPI journal article supplement (doi:10.3390/molecules27217494), 2022-11-03
Supplement: s1 [file s1]

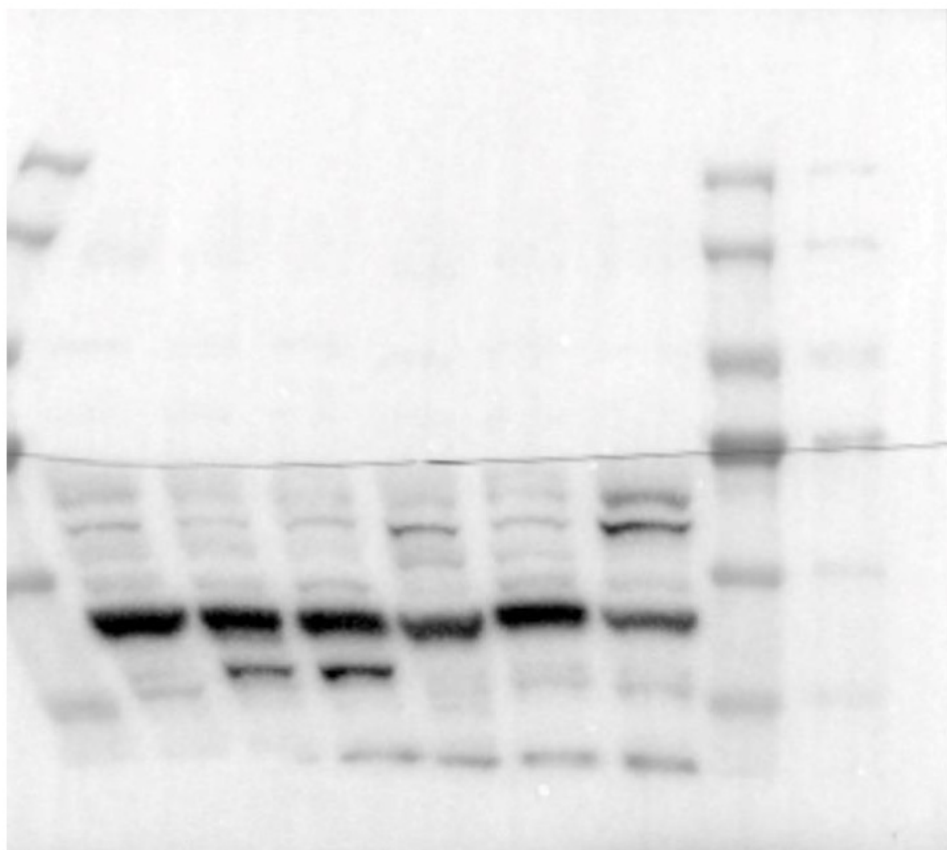

**Figure S1.** The full PVDF membrane diagram of Figure 3.

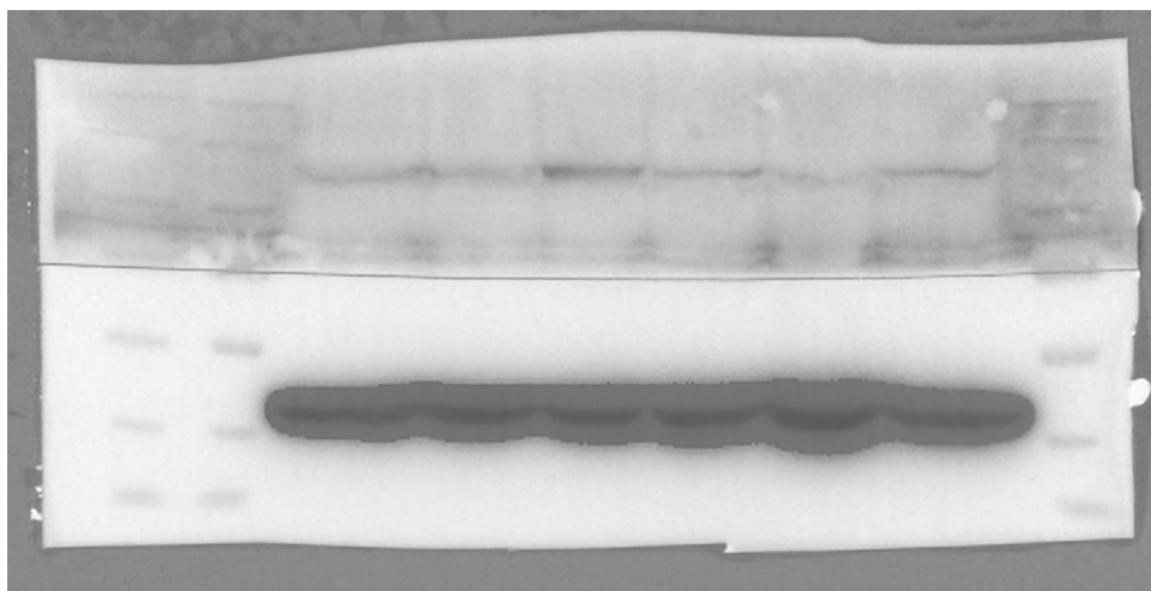

**Figure S2.** The full PVDF membrane diagram of Figure 8.
